# Supplementary material for: Early-generated interneurons regulate neuronal circuit formation during early postnatal development
Source: eLife. 2019 May 23;8:e44649. doi: 10.7554/eLife.44649 (PMC6533056; doi:10.7554/eLife.44649)
Supplement: Figure 1—source data 1. [file elife-44649-fig1-data1.xlsx]

## Sheet: Sheet1 
Figure 1-source data 1: Detailed statistical analysis, detailed data, exact sample numbers, and p values in Figure 1 and detailed cell densities of EGIns and pRIns.
Figure number	Test used	n number	Descriptive Stats (mean ± SEM)	p value
Figure. 1C	Mann-Whitney U Test	EGIns: n = 7 mice; pRIns: n = 6 mice	L1: EGIns, 0.2 ± 0.2%; pRIns, 6.4 ± 0.6%	p < 0.001
			L2/3: EGIns, 25.5 ± 2.3%; pRIns, 20.5 ± 1.0%	p = 0.070
			L4: EGIns, 22.5 ± 1.9%; pRIns, 19.2 ± 0.9%	p = 0.142
			L5/6: EGIns, 51.8 ± 2.4%; pRIns, 53.9 ± 1.2%	p = 0.262
Figure. 1E	two-tailed unpaired t-test		SST: EGIns, 60.1 ± 3.7%; pRIns, 35.2 ± 1.7%	p < 0.001
	Mann-Whitney U Test		nNOS: EGIns, 9.9 ± 1.6%; pRIns, 2.9 ± 0.6%	p = 0.002
	Mann-Whitney U Test		NPY: EGIns, 6.9 ± 3.7%; pRIns, 1.8 ± 0.4%	p = 0.035
	Mann-Whitney U Test		PV: EGIns, 12.3 ± 2.1%; pRIns, 19.3 ± 1.3%	p = 0.023
	Mann-Whitney U Test		VIP: EGIns, 1.7 ± 0.7%; pRIns, 6.3 ± 0.9%	p < 0.001
	two-tailed unpaired t-test		CR: EGIns, 14.8 ± 2.3%; pRIns, 13.1 ± 1.4%	p = 0.547
Cell densities	NA		EGIns, 3.0 ± 0.2 cells/mm2; pRIns, 41.4 ± 2.0 cells/mm2	NA
Figure 1-figure supplement 2F and L	NA	E11: n = 3 mice; E15: n = 4 mice	E9.5: EYFP+/Ki67+/OLIG2+: 0%; EYFP+/Ki67+/OLIG2-: 0%; EYFP+/Ki67-/OLIG2-: 100% E13.5: EYFP+/Ki67+/OLIG2+: 0%; EYFP+/Ki67+/OLIG2-: 0.5 ± 0.5%; EYFP+/Ki67-/OLIG2-: 99.5 ± 0.5%	NA
Figure 1-figure supplement 3	two-tailed unpaired t-test	n = 7 mice	SOM: sEGIns, 65.6 ± 6.4%; dEGIns, 59.1 ± 4.5%	p = 0.402
	Mann-Whitney U Test		PV: sEGIns, 9.2 ± 3.9%; dEGIns, 11.6 ± 3.6%	p = 0.491
	Mann-Whitney U Test		nNOS: sEGIns, 13.3 ± 6.7%; dEGIns, 9.4 ± 2.8%	p = 0.223
	Mann-Whitney U Test		NPY: sEGIns, 11.0 ± 5.2%; dEGIns, 5.9 ± 1.6%	p = 0.642
	Mann-Whitney U Test		CR: sEGIns, 39.2 ± 6.5%; dEGIns, 4.5 ± 1.7%	p < 0.001
	Mann-Whitney U Test		NPY: sEGIns, 1.9 ± 1.9%; dEGIns, 3.4 ± 2.0%	p = 0.307
