# Supplementary material for: Early-generated interneurons regulate neuronal circuit formation during early postnatal development
Source: eLife. 2019 May 23;8:e44649. doi: 10.7554/eLife.44649 (PMC6533056; doi:10.7554/eLife.44649)
Supplement: Figure 2—source data 1. [file elife-44649-fig2-data1.xlsx]

## Sheet: Sheet1
Figure 2-source data 1: Detailed statistical analysis, detailed data, exact sample numbers, and p values in Figure 2 and Figure 2-figure supplement 1–4.
Figure number	Test used	n number	Descriptive Stats (mean ± SEM)	p value
Figure 2B	two-tailed unpaired t-test	EGIns: n = 6 mice; pRIns: n = 3 mice	EGIns: -45.4 ± 0.8 mV; pRIns: -44.3 ± 0.9 mV	p = 0.358
Figure 2C	Mann-Whitney U Test		EGIns: 58.8 ± 1.3 mV; pRIns: 56.4 ± 1.6 mV	p = 0.426
Figure 2D	Mann-Whitney U Test		EGIns: 2.7 ± 0.2 ms; pRIns: 3.7 ± 0.1 ms	p < 0.001
Figure 2E	Mann-Whitney U Test		EGIns: 345.9 ± 24.4 MΩ; pRIns: 689.0 ± 34.2 MΩ	p < 0.001
Figure 2G	Mann-Whitney U Test	EGIns: n = 6 mice; pRIns: n = 4 mice	EGIns: 4.9 ± 0.8 mm; pRIns: 2.3 ± 0.3 mm	p = 0.003
Figure 2H	Mann-Whitney U Test		EGIns: 12308 ± 2753 μm2; pRIns: 5163 ± 622 μm2	p = 0.031
Figure 2I	Mann-Whitney U Test		EGIns: 43.6 ± 5.9; pRIns: 13.0 ± 2.0	p < 0.001
Figure 2J	Mann-Whitney U Test		EGIns: 1.9 ± 0.2 mm; pRIns: 0.9 ± 0.1 mm	p < 0.001
Figure 2K	Mann-Whitney U Test		EGIns: 4456 ± 522 μm2; pRIns: 1836 ± 312 μm2	p < 0.001
Figure 2L	Mann-Whitney U Test		EGIns: 24.5 ± 2.3; pRIns: 9.1 ± 1.5	p < 0.001
Figure 2-figure supplement 1B	Mann-Whitney U Test	dEGIns: n = 6 mice; sEGIns: n = 5 mice	dEGIns: -45.4 ± 0.8 mV; sEGIns: -38.6 ± 1.6 mV	p < 0.001
Figure 2-figure supplement 1C	two-tailed unpaired t-test		dEGIns: 58.8 ± 1.3 mV; sEGIns: 48.6 ± 2.5 mV	p < 0.001
Figure 2-figure supplement 1D	Mann-Whitney U Test		dEGIns: 2.7 ± 0.2 ms; sEGIns:7.7 ± 0.6 ms	p < 0.001
Figure 2-figure supplement 1E	Mann-Whitney U Test		EGIns: 345.9 ± 24.4 MΩ; pRIns: 716.4 ± 95.1 MΩ	p < 0.001
Figure 2-figure supplement 2B	Mann-Whitney U Test	dEGIns: n = 6 mice; sEGIns: n = 3 mice	dEGIns: 4.9 ± 0.8 mm; sEGIns: 1.3 ± 0.3 mm	p < 0.001
Figure 2-figure supplement 2C	Mann-Whitney U Test		dEGIns: 12308 ± 2753 μm2; sEGIns: 2099 ± 592 μm2	p < 0.001
Figure 2-figure supplement 2D	Mann-Whitney U Test		dEGIns: 43.6 ± 5.9; sEGIns: 10.9 ± 2.6	p < 0.001
Figure 2-figure supplement 2E	Mann-Whitney U Test		dEGIns: 1.9 ± 0.2 mm; sEGIns: 0.7 ± 0.1 mm	p < 0.001
Figure 2-figure supplement 2F	Mann-Whitney U Test		dEGIns: 4456 ± 522 μm2; sEGIns: 1273 ± 165 μm2	p < 0.001
Figure 2-figure supplement 2G	two-tailed unpaired t-test		dEGIns: 24.5 ± 2.3; sEGIns: 10.9 ± 1.6	p < 0.001
Figure 2-figure supplement 3B	two-tailed unpaired t-test	EGIns: n = 13 mice; pRIns: n = 12 mice	EGIns: -48.9 ± 1.0 mV; pRIns: -46.9 ± 0.8 mV	p = 0.161
Figure 2-figure supplement 3C	Mann-Whitney U Test		EGIns: 60.2 ± 1.6 mV; pRIns: 57.6 ± 1.4 mV	p = 0.525
Figure 2-figure supplement 3D	Mann-Whitney U Test		EGIns: 1.7 ± 0.1 ms; pRIns: 1.8 ± 0.1 ms	p = 1.000
Figure 2-figure supplement 3E	Mann-Whitney U Test		EGIns: 345.4 ± 22.6 MΩ; pRIns: 325.2 ± 26.4 MΩ	p = 0.318
Figure 2-figure supplement 4B	two-tailed unpaired t-test	EGIns: n = 3 mice; pRIns: n = 3 mice	EGIns: 9.0 ± 1.8 mm; pRIns: 8.3 ± 0.9 mm	p = 0.702
Figure 2-figure supplement 4C	two-tailed unpaired t-test		EGIns: 22627 ± 3053 μm2; pRIns: 24097 ± 3128 μm2	p = 0.743
Figure 2-figure supplement 4D	two-tailed unpaired t-test		EGIns: 90.6 ± 25.2; pRIns: 85.4 ± 8.6	p = 0.841
Figure 2-figure supplement 4E	two-tailed unpaired t-test		EGIns: 3.4 ± 0.4 mm; pRIns: 3.4 ± 0.2 mm	p = 0.946
Figure 2-figure supplement 4F	two-tailed unpaired t-test		EGIns: 8292 ± 1233 μm2; pRIns: 8317 ± 570 μm2	p = 0.985
Figure 2-figure supplement 4G	Mann-Whitney U Test		EGIns: 19.8 ± 1.6; pRIns: 24.8 ± 2.7	p = 0.268
