# Supplementary material for: Early-generated interneurons regulate neuronal circuit formation during early postnatal development
Source: eLife. 2019 May 23;8:e44649. doi: 10.7554/eLife.44649 (PMC6533056; doi:10.7554/eLife.44649)
Supplement: Figure 3—source data 1. [file elife-44649-fig3-data1.xlsx]

## Sheet: Sheet1
Figure 3-source data 1: Detailed statistical analysis, detailed data, exact sample numbers, and p values in Figure 3 and Figure 3-figure supplement 1.
Figure number	Test used	n number	Descriptive Stats (mean ± SEM)	p value
Figure 3E	Mann-Whitney U Test	EGIns: n =5 mice; pRIns: n = 3 mice	EGIns: 1.9 ± 0.3 Hz; pRIns: 0.7 ± 0.1 Hz	p < 0.001
Figure 3F			EGIns: 18.1 ± 1.2 pA; pRIns: 16.5 ± 0.9 pA	p = 0.392
Figure 3G			EGIns: 0.7 ± 0.1 Hz; pRIns: 0.5 ± 0.1 Hz	p = 0.040
Figure 3H			EGIns: 17.6 ± 1.0 pA ; pRIns: 15.3 ± 0.7 pA	p = 0.070
Figure 3-figure supplement 1B	Mann-Whitney U Test	dEGIns: n =5 mice; sEGIns: n = 4 mice	dEGIns: 1.9 ± 0.3 Hz; sEGIns: 1.3 ± 0.3 Hz	p = 0.082
Figure 3-figure supplement 1C			dEGIns: 18.1 ± 1.2 pA; sEGIns: 13.3 ± 1.3 pA	p = 0.005
Figure 3-figure supplement 1D			dEGIns: 0.7 ± 0.1 Hz; sEGIns: 0.6 ± 0.2 Hz	p = 0.109
Figure 3-figure supplement 1E			dEGIns: 17.6 ± 1.0 pA ; sEGIns: 17.2 ± 2.6 pA	p = 0.410
