# Supplementary material for: Early-generated interneurons regulate neuronal circuit formation during early postnatal development
Source: eLife. 2019 May 23;8:e44649. doi: 10.7554/eLife.44649 (PMC6533056; doi:10.7554/eLife.44649)
Supplement: Figure 5—source data 1. [file elife-44649-fig5-data1.xlsx]

## Sheet: Sheet1
Figure 5-source data 1: Detailed statistical analysis, detailed data, exact sample numbers, and p values in Figure 5 and Figure 5-figure supplement 1.
Figure number	Test used	number of GDPs	Descriptive Stats (Quartiles)	p value
Figure 5C	Kruskal-Wallis test with Dunn's Multiple Comparison test	Pre-stimulus: n = 17	Minimum: 2.8; 25% Percentile: 6.2; Median: 7.3; 75% Percentile: 13.7; Maximum: 26.5	p < 0.001, with Dunn's Multiple Comparison test: pre-stim vs stim, p <0.001; stim vs post-stim, p < 0.001; pre-stim vs post-stim, p = 0.320
		Stimulation: n = 44	Minimum: 1.6; 25% Percentile: 3.0; Median: 3.8; 75% Percentile: 4.7; Maximum: 9.0
		Post-stimulus: n = 20	Minimum: 3.2; 25% Percentile: 4.9; Median: 6.0; 75% Percentile: 9.0; Maximum: 35.3
Figure 5-figure supplement 1B	one-way ANOVA with post-hoc Tukey HSD test	Pre-stimulus: n = 15	Minimum: 6.9; 25% Percentile: 7.6；Median: 11.6; 75% Percentile: 14.5; Maximum: 22.3	F (2,34) = 4.951, p = 0.013; with post-hoc Tukey HSD test： pre-stim vs stim, p = 0.017; stim vs post-stim, p = 0.023; pre-stim vs post-stim, p = 0.900
		Stimulation: n = 8	Minimum: 6.6; 25% Percentile: 16.5; Median: 20.2; 75% Percentile: 25.8; Maximum: 40.9
		Post-stimulus: n = 14	Minimum: 1.8; 25% Percentile: 5.6; Median: 8.1; 75% Percentile: 20.3; Maximum: 30.7
Figure 5-figure supplement 1D	Kruskal-Wallis test	Pre-stimulus: n = 18	Minimum: 4.8; 25% Percentile: 7.6; Median: 9.0; 75% Percentile: 11.6; Maximum: 15.8	p = 0.486
		Stimulation: n = 17	Minimum: 3.1; 25% Percentile: 6.6; Median: 10.0; 75% Percentile: 14.4; Maximum: 19.0
		Post-stimulus: n = 16	Minimum: 7.3; 25% Percentile:8.7；Median: 10.6; 75% Percentile: 12.7; Maximum: 19.1
