# Supplementary material for: Early-generated interneurons regulate neuronal circuit formation during early postnatal development
Source: eLife. 2019 May 23;8:e44649. doi: 10.7554/eLife.44649 (PMC6533056; doi:10.7554/eLife.44649)
Supplement: Figure 6—source data 1. [file elife-44649-fig6-data1.xlsx]

## Sheet: Sheet1 
Figure 6-source data 1: Detailed statistical analysis, detailed data, exact sample numbers, and p values in Figure 6 and Figure 6-figure supplement 1–3.
Figure number	Test used	n number	Descriptive Stats (mean ± SEM)	p value
Figure 6C	two-way ANOVA followed by two-tailed unpaired t-test	n = 3 mice	EGIn-saline: 8.3 ± 0.4 cells/mm2	Genotype × treatment ANOVA, effect of treatment only, F (1,237) = 627.66, p < 0.001; EGIn-saline vs EGIn-DT, p < 0.001; EGIn-saline vs pRIn-saline, p = 0.381; pRIn-saline vs pRIn-DT, p < 0.001; EGIn-DT vs pRIn-DT, p = 0.939
		n = 3 mice	EGIn-DT: 0.4 ± 0.1 cells/mm2
		n = 4 mice	pRIn-saline: 7.8 ± 0.4 cells/mm2
		n = 3 mice	pRIn-DT: 0.4 ± 0.1 cells/mm2
Figure 6E	Kruskal-Wallis test with Dunn's Multiple Comparison test, further adjusted by the Holm FWER method	n = 7 mice	EGIn-DT: 0.071 ± 0.009 Hz	p = 0.001, with Dunn's Multiple Comparison test: EGIn-DT vs pRIn-DT: p = 0.016; EGIn-DT vs WT-DT: p = 0.034; pRIn-DT vs WT-DT: p = 0.493
		n = 4 mice	pRIn-DT: 0.092 ± 0.008 Hz
		n = 7 mice	WT-DT: 0.102 ± 0.008 Hz
Figure 6G	Kruskal-Wallis test	EGIn-DT: n = 4 mice; pRIn-DT: n = 5 mice; WT-DT: n = 5 mice	EGIn-DT: 0.86 ± 0.05Hz; pRIn-DT: 0.85 ± 0.09Hz; WT-DT: 0.85 ± 0.05Hz	p = 0.387
Figure 6H			EGIn-DT: 9.9 ± 0.5pA; pRIn-DT: 8.9 ± 0.5 pA; WT-DT: 9.3 ± 0.3 pA	p = 0.099
Figure 6I	one-way ANOVA with post-hoc Tukey HSD test		EGIn-DT: 1.30 ± 0.08Hz; pRIn-DT: 1.85 ± 0.11Hz; WT-DT: 1.88 ± 0.12Hz	F(2,129) = 10.729, p < 0.001; with post-hoc Tukey HSD test: EGIn-DT vs pRIn-DT: p = 0.001; EGIn-DT vs WT-DT: p = 0.001; pRIn-DT vs WT-DT: p = 0.900
Figure 6J	Kruskal-Wallis test		EGIn-DT: 15.1 ± 0.4pA; pRIn-DT: 14.3 ± 0.3 pA; WT-DT: 14.8 ± 0.3 pA	p = 0.265
Figure 6-figure supplement 1B	two-tailed unpaired t-test	WT-DT: n = 3 mice; WT-PBS: n = 5 mice	WT-DT: 2.2 ± 0.1 cells/mm2; WT-saline: 2.3 ± 0.2 cells/mm2	p = 0.759
Figure 6-figure supplement 2A	Kruskal-Wallis test	EGIn-DT: n = 4 mice; pRIn-DT: n = 3 mice; WT-DT: n = 8 mice	EGIn-DT: -33.8 ± 0.8 mV; pRIn-DT: -32.6 ± 0.8 mV; WT-DT: -32.9 ± 1.1 mV	p = 0.651
Figure 6-figure supplement 2B	one-way ANOVA		EGIn-DT: 57.3 ± 1.1 mV; pRIn-DT: 58.1 ± 1.7 mV; WT-DT: 56.9 ± 1.1 mV	F (2,63) = 0.197, p = 0.822
Figure 6-figure supplement 2C	Kruskal-Wallis test		EGIn-DT: 11.4 ± 0.9 ms; pRIn-DT:10.4 ± 1.1 ms; WT-DT: 11.0 ± 1.1 ms	p = 0.579
Figure 6-figure supplement 2D	Kruskal-Wallis test		EGIn-DT: 192.0 ± 22.9 MΩ; pRIn-DT: 134.8 ± 24.6 MΩ; WT-DT: 151.4 ± 15.3 MΩ	p = 0.108
Figure 6-figure supplement 3B	one-way ANOVA	EGIn-DT: n = 3 mice; pRIn-DT: n = 3 mice; WT-DT: n = 4 mice	EGIn-DT: 39.0 ± 2.3; pRIn-DT: 38.5 ± 3.8; WT-DT: 44.7 ± 2.3	F (2,54) = 1.754, p = 0.183
Figure 6-figure supplement 3C	one-way ANOVA		EGIn-DT: 3.0 ± 0.2 mm; pRIn-DT: 3.1 ± 0.3 mm; WT-DT: 3.7 ± 0.2 mm	F (2,54) = 2.173, p = 0.124
Figure 6-figure supplement 3D	Kruskal-Wallis test		EGIn-DT: 6103 ± 592 μm2; pRIn-DT: 4892 ± 529 μm2; WT-DT: 7026 ± 539 μm2	p = 0.053
Figure 6-figure supplement 3E	one-way ANOVA		EGIn-DT: 15.9 ± 1.9; pRIn-DT: 13.8 ± 1.5; WT-DT: 16.8 ± 1.8	F (2,54) = 0.584, p = 0.561
Figure 6-figure supplement 3F	one-way ANOVA		EGIn-DT: 2.4 ± 0.3 mm; pRIn-DT: 2.1 ± 0.2 mm; WT-DT: 2.6 ± 0.3 mm	F (2,54) = 0.578, p = 0.564
Figure 6-figure supplement 3G	Kruskal-Wallis test		EGIn-DT: 2635 ± 359 μm2; pRIn-DT: 1833 ± 237 μm2; WT-DT: 2427 ± 299 μm2	p = 0.455
Figure 6-figure supplement 3H	Kruskal-Wallis test		EGIn-DT: 8.9 ± 1.6; pRIn-DT: 8.7 ± 2.0; WT-DT: 11.7 ± 1.1	p = 0.102
Figure 6-figure supplement 3I	Kruskal-Wallis test		EGIn-DT: 0.8 ± 0.1 mm; pRIn-DT: 0.9 ± 0.2 mm; WT-DT: 1.2 ± 0.1 mm	p = 0.066
Figure 6-figure supplement 3J	Kruskal-Wallis test		EGIn-DT: 1061 ± 157 μm2; pRIn-DT: 958 ± 334 μm2; WT-DT: 1622 ± 321 μm2	p = 0.094
