# Supplementary material for: Early-generated interneurons regulate neuronal circuit formation during early postnatal development
Source: eLife. 2019 May 23;8:e44649. doi: 10.7554/eLife.44649 (PMC6533056; doi:10.7554/eLife.44649)
Supplement: Figure 7—source data 1. [file elife-44649-fig7-data1.xlsx]

## Sheet: Sheet1 
Figure 7-source data 1: Detailed statistical analysis, detailed data, exact sample numbers, and p values in Figure 7.
Figure number	Test used	n number	Descriptive Stats (mean ± SEM)	p value
Figure 7D	two-tailed Fisher’s exact test	Control: n = 7 mice; DTR: n = 12 mice	Control: 26.9%; DTR: 9.3%	p = 0.008
Figure 7E	Mann-Whitney U Test	Control: n = 13; DTR: n = 8	Control: 26.2 ± 9.6 pA; DTR: 45.5 ± 11.7 pA	p = 0.223
Figure 7F	two-tailed unpaired t-test		Control: 18.5 ± 2.2 ms; DTR: 19.1 ± 2.7 ms	p = 0.872
Figure 7G	Mann-Whitney U Test		Control: 16.9 ± 5.5%; DTR: 10.0 ± 5.0%	p = 0.399
Figure 7H	Mann-Whitney U Test	Control: n = 12; DTR: n = 8	Control: 0.299 ± 0.045. DTR: 0.385 ± 0.046	p = 0.133
Figure 7J	two-way ANOVA		Control, p2/p1: 0.830 ± 0.055; p3/p1: 0.663 ± 0.071; p4/p1: 0.650 ± 0.076. DTR, p2/p1: 0.662 ± 0.053; p3/p1: 0.591 ± 0.043; p4/p1: 0.436 ± 0.049	Genotype: F(1,72) = 8.01, p = 0.006; Number: F(3,72) = 24.50, p < 0.001; Genotype × Number: F(3,72) =1.43, p = 0.241
